# Supplementary material
Source: MDPI journal article supplement (https://www.mdpi.com/2673-7426/3/4/55)
Supplement: s1 [file s1]

Supplementary Table S1. Top 10 drugs for each virus and docking parameters

| Flaviviridae - Hepatitis C virus  |                      |        |         |                   |                |                                |          |             |  |
|-----------------------------------|----------------------|--------|---------|-------------------|----------------|--------------------------------|----------|-------------|--|
| Drug information                  |                      |        |         |                   |                | Other relevant docking results |          |             |  |
| drug name                         | rotatable bond count | TPSA   | Weight  | H2 acceptor count | H2 donor count | rseq                           | S-score  | cas         |  |
| Sirolimus                         | 6                    | 195.43 | 914.187 | 12                | 3              | 1                              | -8.13943 | 53123-88-9  |  |
| Trabectedin                       | 4                    | 168.72 | 761.849 | 12                | 4              | 1                              | -7.73204 | 114899-77-3 |  |
| Digoxin                           | 7                    | 203.06 | 780.949 | 13                | 6              | 1                              | -7.35699 | 20830-75-5  |  |
| Tacrolimus                        | 7                    | 178.36 | 804.031 | 11                | 3              | 1                              | -7.17397 | 104987-11-3 |  |
| Rifapentine                       | 6                    | 220.15 | 877.045 | 13                | 6              | 1                              | -7.04585 | 61379-65-5  |  |
| Rifabutin                         | 5                    | 205.55 | 847.019 | 12                | 5              | 1                              | -6.98407 | 72559-06-9  |  |
| Azithromycin                      | 7                    | 180.08 | 748.996 | 13                | 5              | 1                              | -6.82006 | 83905-01-5  |  |
| Dalfopristin                      | 7                    | 176.42 | 690.859 | 9                 | 2              | 1                              | -6.73667 | 112362-50-2 |  |
| Moxidectin                        | 3                    | 116.04 | 639.83  | 7                 | 2              | 1                              | -6.70568 | 113507-06-5 |  |
| Pimecrolimus                      | 6                    | 158.13 | 810.466 | 10                | 2              | 1                              | -6.64757 | 137071-32-0 |  |
|                                   |                      |        |         |                   |                |                                |          |             |  |
| Flaviviridae - Yellow fever virus |                      |        |         |                   |                |                                |          |             |  |
| Drug information                  |                      |        |         |                   |                | Other relevant docking results |          |             |  |
| drug name                         | rotatable bond count | TPSA   | Weight  | H2 acceptor count | H2 donor count | rseq                           | S-score  | cas         |  |
| Sirolimus                         | 6                    | 195.43 | 914.187 | 12                | 3              | 1                              | -8.79    | 53123-88-9  |  |
| Tacrolimus                        | 7                    | 178.36 | 804.031 | 11                | 3              | 1                              | -7.78344 | 104987-11-3 |  |
| Rifampin                          | 5                    | 220.15 | 822.953 | 13                | 6              | 1                              | -7.50406 | 13292-46-1  |  |
| Rifapentine                       | 6                    | 220.15 | 877.045 | 13                | 6              | 1                              | -7.48355 | 61379-65-5  |  |
| Pimecrolimus                      | 6                    | 158.13 | 810.466 | 10                | 2              | 1                              | -7.44173 | 137071-32-0 |  |
| Rifabutin                         | 5                    | 205.55 | 847.019 | 12                | 5              | 1                              | -7.24808 | 72559-06-9  |  |
| Digoxin                           | 7                    | 203.06 | 780.949 | 13                | 6              | 1                              | -7.19704 | 20830-75-5  |  |
| Eribulin                          | 4                    | 146.39 | 729.908 | 12                | 2              | 1                              | -6.88494 | 253128-41-5 |  |
| Etoposide                         | 5                    | 160.83 | 588.562 | 12                | 3              | 1                              | -6.88186 | 33419-42-0  |  |
| Erythromycin                      | 7                    | 193.91 | 733.937 | 13                | 5              | 1                              | -6.73789 | 114-07-8    |  |
|                                   |                      |        |         |                   |                |                                |          |             |  |
| Flaviviridae - Zika virus         |                      |        |         |                   |                |                                |          |             |  |

| Drug information                           |                      |        |         |                   |                | Other relevant docking results |          |              |  |
|--------------------------------------------|----------------------|--------|---------|-------------------|----------------|--------------------------------|----------|--------------|--|
| drug name                                  | rotatable bond count | TPSA   | Weight  | H2 acceptor count | H2 donor count | rseq                           | S-score  | cas          |  |
| Pimecrolimus                               | 6                    | 158.13 | 810.466 | 10                | 2              | 1                              | -7.34036 | 137071-32-0  |  |
| Sirolimus                                  | 6                    | 195.43 | 914.187 | 12                | 3              | 1                              | -7.31482 | 53123-88-9   |  |
| Tacrolimus                                 | 7                    | 178.36 | 804.031 | 11                | 3              | 1                              | -7.28614 | 104987-11-3  |  |
| Ergotamine                                 | 5                    | 118.21 | 581.673 | 6                 | 3              | 1                              | -7.03937 | 113-15-5     |  |
| M Fostamatinib                             | 7                    | 128.75 | 470.461 | 8                 | 3              | 1                              | -6.89724 | 841290-80-0  |  |
| Conivaptan                                 | 6                    | 78.09  | 498.586 | 4                 | 3              | 1                              | -6.85443 | 210101-16-9  |  |
| Ergoloid                                   | 6                    | 118.21 | 591.753 | 6                 | 3              | 1                              | -6.84152 | 8067-24-1    |  |
| Abemaciclib                                | 7                    | 75     | 506.605 | 6                 | 1              | 1                              | -6.80595 | 1231929-97-7 |  |
| Dihydroergotamine                          | 5                    | 118.21 | 583.689 | 6                 | 3              | 1                              | -6.80464 | 511-12-6     |  |
| Eravacycline                               | 6                    | 193.73 | 558.563 | 10                | 8              | 1                              | -6.80014 | 1207283-85-9 |  |
|                                            |                      |        |         |                   |                |                                |          |              |  |
| Flaviviridae - Bovine viral diarrhea virus |                      |        |         |                   |                |                                |          |              |  |
| Drug information                           |                      |        |         |                   |                | Other relevant docking results |          |              |  |
| drug name                                  | rotatable bond count | TPSA   | Weight  | H2 acceptor count | H2 donor count | rseq                           | S-score  | cas          |  |
| Rifampin                                   | 5                    | 220.15 | 822.953 | 13                | 6              | 1                              | -6.93071 | 13292-46-1   |  |
| Sirolimus                                  | 6                    | 195.43 | 914.187 | 12                | 3              | 1                              | -6.73035 | 53123-88-9   |  |
| Dalfopristin                               | 7                    | 176.42 | 690.859 | 9                 | 2              | 1                              | -6.46299 | 112362-50-2  |  |
| Digoxin                                    | 7                    | 203.06 | 780.949 | 13                | 6              | 1                              | -6.35662 | 20830-75-5   |  |
| Pimecrolimus                               | 6                    | 158.13 | 810.466 | 10                | 2              | 1                              | -6.28407 | 137071-32-0  |  |
| Telmisartan                                | 7                    | 75.77  | 513.621 | 2                 | 0              | 1                              | -6.22064 | 144701-48-4  |  |
| Tacrolimus                                 | 7                    | 178.36 | 804.031 | 11                | 3              | 1                              | -6.01496 | 104987-11-3  |  |
| Avapritinib                                | 5                    | 105.75 | 498.57  | 6                 | 1              | 1                              | -6.01013 | 1703793-34-3 |  |
| Irinotecan                                 | 6                    | 112.51 | 586.689 | 6                 | 1              | 1                              | -5.99025 | 97682-44-5   |  |
| Rifamycin                                  | 3                    | 201.31 | 697.778 | 11                | 6              | 1                              | -5.97969 | 6998-60-3    |  |
|                                            |                      |        |         |                   |                |                                |          |              |  |
| Flaviviridae - West Nile virus             |                      |        |         |                   |                |                                |          |              |  |
| Drug information                           |                      |        |         |                   |                | Other relevant docking results |          |              |  |

| drug name                                           | rotatable bond count | TPSA   | Weight  | H2 acceptor count | H2 donor count | rseq                                  | S-score  | cas          |  |
|-----------------------------------------------------|----------------------|--------|---------|-------------------|----------------|---------------------------------------|----------|--------------|--|
| Sirolimus                                           | 6                    | 195.43 | 914.187 | 0                 | 3              | 1                                     | -7.18091 | 53123-88-9   |  |
| Rifampin                                            | 5                    | 220.15 | 822.953 | 0                 | 6              | 1                                     | -6.56624 | 13292-46-1   |  |
| Pimecrolimus                                        | 6                    | 158.13 | 810.466 | 0                 | 2              | 1                                     | -6.52908 | 137071-32-0  |  |
| Tacrolimus                                          | 7                    | 178.36 | 804.031 | 0                 | 3              | 1                                     | -6.44666 | 104987-11-3  |  |
| Rifamycin                                           | 3                    | 201.31 | 697.778 | 0                 | 6              | 1                                     | -6.391   | 6998-60-3    |  |
| Eribulin                                            | 4                    | 146.39 | 729.908 | 0                 | 2              | 1                                     | -6.23569 | 253128-41-5  |  |
| Etoposide Phosphate                                 | 7                    | 201.04 | 666.525 | 0                 | 2              | 1                                     | -6.16796 | 117091-64-2  |  |
| Vorapaxar                                           | 7                    | 77.52  | 492.591 | 0                 | 1              | 1                                     | -6.16266 | 618385-01-6  |  |
| Rifabutin                                           | 5                    | 205.55 | 847.019 | 0                 | 5              | 1                                     | -6.14315 | 72559-06-9   |  |
| Naldemedine                                         | 7                    | 141.18 | 570.646 | 0                 | 4              | 1                                     | -6.13882 | 916072-89-4  |  |
|                                                     |                      |        |         |                   |                |                                       |          |              |  |
| <b>Flaviviridae - Dengue virus</b>                  |                      |        |         |                   |                |                                       |          |              |  |
| <b>Drug information</b>                             |                      |        |         |                   |                | <b>Other relevant docking results</b> |          |              |  |
| drug name                                           | rotatable bond count | TPSA   | Weight  | H2 acceptor count | H2 donor count | rseq                                  | S-score  | cas          |  |
| Sirolimus                                           | 6                    | 195.43 | 914.187 | 12                | 3              | 1                                     | -6.9541  | 53123-88-9   |  |
| Irinotecan                                          | 6                    | 112.51 | 586.689 | 6                 | 1              | 1                                     | -6.73786 | 97682-44-5   |  |
| Dalfopristin                                        | 7                    | 176.42 | 690.859 | 9                 | 2              | 1                                     | -6.71463 | 112362-50-2  |  |
| Tacrolimus                                          | 7                    | 178.36 | 804.031 | 11                | 3              | 1                                     | -6.6993  | 104987-11-3  |  |
| Rifapentine                                         | 6                    | 220.15 | 877.045 | 13                | 6              | 1                                     | -6.49837 | 61379-65-5   |  |
| Plerixafor                                          | 4                    | 78.66  | 502.796 | 8                 | 6              | 1                                     | -6.4804  | 110078-46-1  |  |
| Dasabuvir                                           | 6                    | 104.81 | 493.584 | 5                 | 2              | 1                                     | -6.45614 | 1132935-63-7 |  |
| Rifamycin                                           | 3                    | 201.31 | 697.778 | 11                | 6              | 1                                     | -6.44513 | 6998-60-3    |  |
| Rifampin                                            | 5                    | 220.15 | 822.953 | 13                | 6              | 1                                     | -6.37859 | 13292-46-1   |  |
| Acalabrutinib                                       | 7                    | 118.5  | 465.517 | 5                 | 2              | 1                                     | -6.33797 | 1420477-60-6 |  |
|                                                     |                      |        |         |                   |                |                                       |          |              |  |
| <b>Flaviviridae - Tick-borne encephalitis virus</b> |                      |        |         |                   |                |                                       |          |              |  |
| <b>Drug information</b>                             |                      |        |         |                   |                | <b>Other relevant docking results</b> |          |              |  |

| drug name                                         | rotatable<br>bond<br>count | TPSA   | Weight  | H2<br>acceptor<br>count | H2<br>donor<br>count | rseq                           | S-score  | cas          |  |
|---------------------------------------------------|----------------------------|--------|---------|-------------------------|----------------------|--------------------------------|----------|--------------|--|
| Tacrolimus                                        | 7                          | 178.36 | 804.031 | 11                      | 3                    | 1                              | -7.54614 | 104987-11-3  |  |
| Eribulin                                          | 4                          | 146.39 | 729.908 | 12                      | 2                    | 1                              | -7.31986 | 253128-41-5  |  |
| Rifapentine                                       | 6                          | 220.15 | 877.045 | 13                      | 6                    | 1                              | -7.30403 | 61379-65-5   |  |
| Pimecrolimus                                      | 6                          | 158.13 | 810.466 | 10                      | 2                    | 1                              | -7.25235 | 137071-32-0  |  |
| Sirolimus                                         | 6                          | 195.43 | 914.187 | 12                      | 3                    | 1                              | -7.07288 | 53123-88-9   |  |
| Rifampin                                          | 5                          | 220.15 | 822.953 | 13                      | 6                    | 1                              | -6.77447 | 13292-46-1   |  |
| Dalfopristin                                      | 7                          | 176.42 | 690.859 | 9                       | 2                    | 1                              | -6.76605 | 112362-50-2  |  |
| Plerixafor                                        | 4                          | 78.66  | 502.796 | 8                       | 6                    | 1                              | -6.61759 | 110078-46-1  |  |
| Digoxin                                           | 7                          | 203.06 | 780.949 | 13                      | 6                    | 1                              | -6.52795 | 20830-75-5   |  |
| Rifamycin                                         | 3                          | 201.31 | 697.778 | 11                      | 6                    | 1                              | -6.48052 | 6998-60-3    |  |
|                                                   |                            |        |         |                         |                      |                                |          |              |  |
| <b>Flaviviridae - Classical swine fever virus</b> |                            |        |         |                         |                      |                                |          |              |  |
| Drug information                                  |                            |        |         |                         |                      | Other relevant docking results |          |              |  |
| drug name                                         | rotatable<br>bond<br>count | TPSA   | Weight  | H2<br>acceptor<br>count | H2<br>donor<br>count | rseq                           | S-score  | cas          |  |
| Sirolimus                                         | 6                          | 195.43 | 914.187 | 12                      | 3                    | 1                              | -7.35583 | 53123-88-9   |  |
| Etoposide Phosphate                               | 7                          | 201.04 | 666.525 | 12                      | 2                    | 1                              | -7.07113 | 117091-64-2  |  |
| Dalfopristin                                      | 7                          | 176.42 | 690.859 | 9                       | 2                    | 1                              | -7.03491 | 112362-50-2  |  |
| Rifapentine                                       | 6                          | 220.15 | 877.045 | 13                      | 6                    | 1                              | -6.98608 | 61379-65-5   |  |
| Tacrolimus                                        | 7                          | 178.36 | 804.031 | 11                      | 3                    | 1                              | -6.88011 | 104987-11-3  |  |
| Ciclesonide                                       | 6                          | 99.13  | 540.697 | 6                       | 1                    | 1                              | -6.8731  | 126544-47-6  |  |
| Ubrogepant                                        | 6                          | 104.29 | 549.553 | 5                       | 2                    | 1                              | -6.78134 | 1374248-77-7 |  |
| Etoposide                                         | 5                          | 160.83 | 588.562 | 12                      | 3                    | 1                              | -6.71705 | 33419-42-0   |  |
| Pimecrolimus                                      | 6                          | 158.13 | 810.466 | 10                      | 2                    | 1                              | -6.71489 | 137071-32-0  |  |
| Trametinib                                        | 6                          | 102.06 | 615.403 | 4                       | 2                    | 1                              | -6.70854 | 871700-17-3  |  |
|                                                   |                            |        |         |                         |                      |                                |          |              |  |
| <b>Flaviviridae - Japanese encephalitis virus</b> |                            |        |         |                         |                      |                                |          |              |  |
| Drug information                                  |                            |        |         |                         |                      | Other relevant docking results |          |              |  |

| drug name                                               | rotatable<br>bond<br>count | TPSA   | Weight  | H2<br>acceptor<br>count | H2<br>donor<br>count | rseq                           | S-score  | cas         |  |
|---------------------------------------------------------|----------------------------|--------|---------|-------------------------|----------------------|--------------------------------|----------|-------------|--|
| Sirolimus                                               | 6                          | 195.43 | 914.187 | 12                      | 3                    | 1                              | -9.83446 | 53123-88-9  |  |
| Rifampin                                                | 5                          | 220.15 | 822.953 | 13                      | 6                    | 1                              | -9.80233 | 13292-46-1  |  |
| Etoposide Phosphate                                     | 7                          | 201.04 | 666.525 | 12                      | 2                    | 1                              | -9.58387 | 117091-64-2 |  |
| Plerixafor                                              | 4                          | 78.66  | 502.796 | 8                       | 6                    | 1                              | -9.48926 | 110078-46-1 |  |
| Tacrolimus                                              | 7                          | 178.36 | 804.031 | 11                      | 3                    | 1                              | -9.11698 | 104987-11-3 |  |
| Dihydroergotamine                                       | 5                          | 118.21 | 583.689 | 6                       | 3                    | 1                              | -9.11423 | 511-12-6    |  |
| Ergoloid                                                | 6                          | 118.21 | 591.753 | 6                       | 3                    | 1                              | -9.11336 | 8067-24-1   |  |
| Digoxin                                                 | 7                          | 203.06 | 780.949 | 13                      | 6                    | 1                              | -8.9296  | 20830-75-5  |  |
| Bromocriptine                                           | 6                          | 118.21 | 654.606 | 6                       | 3                    | 1                              | -8.87967 | 25614-03-3  |  |
| Doxorubicin                                             | 5                          | 206.07 | 543.525 | 12                      | 6                    | 1                              | -8.86258 | 23214-92-8  |  |
|                                                         |                            |        |         |                         |                      |                                |          |             |  |
| <b>Caliciviridae - Rabbit Hemorrhagic Disease Virus</b> |                            |        |         |                         |                      |                                |          |             |  |
| Drug information                                        |                            |        |         |                         |                      | Other relevant docking results |          |             |  |
| drug name                                               | rotatable<br>bond<br>count | TPSA   | Weight  | H2<br>acceptor<br>count | H2<br>donor<br>count | rseq                           | S-score  | cas         |  |
| Sirolimus                                               | 6                          | 195.43 | 914.187 | 12                      | 3                    | 1                              | -8.08678 | 53123-88-9  |  |
| Pimecrolimus                                            | 6                          | 158.13 | 810.466 | 10                      | 2                    | 1                              | -7.92432 | 137071-32-0 |  |
| Tacrolimus                                              | 7                          | 178.36 | 804.031 | 11                      | 3                    | 1                              | -7.73171 | 104987-11-3 |  |
| Rifapentine                                             | 6                          | 220.15 | 877.045 | 13                      | 6                    | 1                              | -7.3618  | 61379-65-5  |  |
| Rifampin                                                | 5                          | 220.15 | 822.953 | 13                      | 6                    | 1                              | -7.3377  | 13292-46-1  |  |
| Azithromycin                                            | 7                          | 180.08 | 748.996 | 13                      | 5                    | 1                              | -7.26007 | 83905-01-5  |  |
| Dalfopristin                                            | 7                          | 176.42 | 690.859 | 9                       | 2                    | 1                              | -7.24238 | 112362-50-2 |  |
| Dihydroergotamine                                       | 5                          | 118.21 | 583.689 | 6                       | 3                    | 1                              | -7.19197 | 511-12-6    |  |
| Digoxin                                                 | 7                          | 203.06 | 780.949 | 13                      | 6                    | 1                              | -7.08502 | 20830-75-5  |  |
| Eribulin                                                | 4                          | 146.39 | 729.908 | 12                      | 2                    | 1                              | -7.03538 | 253128-41-5 |  |
|                                                         |                            |        |         |                         |                      |                                |          |             |  |
| <b>Caliciviridae - Norwalk virus</b>                    |                            |        |         |                         |                      |                                |          |             |  |
| Drug information                                        |                            |        |         |                         |                      | Other relevant docking results |          |             |  |

| drug name                               | rotatable<br>bond<br>count | TPSA   | Weight  | H2<br>acceptor<br>count | H2<br>donor<br>count | rseq                           | S-score  | cas         |  |
|-----------------------------------------|----------------------------|--------|---------|-------------------------|----------------------|--------------------------------|----------|-------------|--|
| Pimecrolimus                            | 6                          | 158.13 | 810.466 | 10                      | 2                    | 1                              | -7.74191 | 137071-32-0 |  |
| Rifapentine                             | 6                          | 220.15 | 877.045 | 13                      | 6                    | 1                              | -7.44188 | 61379-65-5  |  |
| Tacrolimus                              | 7                          | 178.36 | 804.031 | 11                      | 3                    | 1                              | -7.41875 | 104987-11-3 |  |
| Moxidectin                              | 3                          | 116.04 | 639.83  | 7                       | 2                    | 1                              | -7.24336 | 113507-06-5 |  |
| Digoxin                                 | 7                          | 203.06 | 780.949 | 13                      | 6                    | 1                              | -7.23942 | 20830-75-5  |  |
| Sirolimus                               | 6                          | 195.43 | 914.187 | 12                      | 3                    | 1                              | -7.17971 | 53123-88-9  |  |
| Eribulin                                | 4                          | 146.39 | 729.908 | 12                      | 2                    | 1                              | -6.95825 | 253128-41-5 |  |
| Dalfopristin                            | 7                          | 176.42 | 690.859 | 9                       | 2                    | 1                              | -6.59857 | 112362-50-2 |  |
| Rifampin                                | 5                          | 220.15 | 822.953 | 13                      | 6                    | 1                              | -6.51454 | 13292-46-1  |  |
| Azithromycin                            | 7                          | 180.08 | 748.996 | 13                      | 5                    | 1                              | -6.48766 | 83905-01-5  |  |
|                                         |                            |        |         |                         |                      |                                |          |             |  |
| <b>Caliciviridae - Sapporo virus</b>    |                            |        |         |                         |                      |                                |          |             |  |
| Drug information                        |                            |        |         |                         |                      | Other relevant docking results |          |             |  |
| drug name                               | rotatable<br>bond<br>count | TPSA   | Weight  | H2<br>acceptor<br>count | H2<br>donor<br>count | rseq                           | S-score  | cas         |  |
| Sirolimus                               | 6                          | 195.43 | 914.187 | 12                      | 3                    | 1                              | -8.62551 | 53123-88-9  |  |
| Pimecrolimus                            | 6                          | 158.13 | 810.466 | 10                      | 2                    | 1                              | -8.28292 | 137071-32-0 |  |
| Rifabutin                               | 5                          | 205.55 | 847.019 | 12                      | 5                    | 1                              | -8.05622 | 72559-06-9  |  |
| Tacrolimus                              | 7                          | 178.36 | 804.031 | 11                      | 3                    | 1                              | -7.93186 | 104987-11-3 |  |
| Digoxin                                 | 7                          | 203.06 | 780.949 | 13                      | 6                    | 1                              | -7.72827 | 20830-75-5  |  |
| Rifampin                                | 5                          | 220.15 | 822.953 | 13                      | 6                    | 1                              | -7.72705 | 13292-46-1  |  |
| Rifapentine                             | 6                          | 220.15 | 877.045 | 13                      | 6                    | 1                              | -7.30792 | 61379-65-5  |  |
| Naldemedine                             | 7                          | 141.18 | 570.646 | 8                       | 4                    | 1                              | -7.30019 | 916072-89-4 |  |
| Daunorubicinol                          | 4                          | 189    | 529.542 | 11                      | 6                    | 1                              | -7.03214 | 28008-55-1  |  |
| Etoposide                               | 5                          | 160.83 | 588.562 | 12                      | 3                    | 1                              | -7.01744 | 33419-42-0  |  |
|                                         |                            |        |         |                         |                      |                                |          |             |  |
| <b>Caliciviridae - Murine norovirus</b> |                            |        |         |                         |                      |                                |          |             |  |
| Drug information                        |                            |        |         |                         |                      | Other relevant docking results |          |             |  |

| drug name                                            | rotatable<br>bond<br>count | TPSA   | Weight  | H2<br>acceptor<br>count | H2<br>donor<br>count | rseq                           | S-score  | cas          |  |
|------------------------------------------------------|----------------------------|--------|---------|-------------------------|----------------------|--------------------------------|----------|--------------|--|
| Tacrolimus                                           | 7                          | 178.36 | 804.031 | 11                      | 3                    | 1                              | -8.97221 | 104987-11-3  |  |
| Sirolimus                                            | 6                          | 195.43 | 914.187 | 12                      | 3                    | 1                              | -8.28578 | 53123-88-9   |  |
| Digoxin                                              | 7                          | 203.06 | 780.949 | 13                      | 6                    | 1                              | -7.52595 | 20830-75-5   |  |
| Rifamycin                                            | 3                          | 201.31 | 697.778 | 11                      | 6                    | 1                              | -7.41853 | 6998-60-3    |  |
| Pimecrolimus                                         | 6                          | 158.13 | 810.466 | 10                      | 2                    | 1                              | -7.23673 | 137071-32-0  |  |
| Eribulin                                             | 4                          | 146.39 | 729.908 | 12                      | 2                    | 1                              | -7.03744 | 253128-41-5  |  |
| Rifampin                                             | 5                          | 220.15 | 822.953 | 13                      | 6                    | 1                              | -6.90614 | 13292-46-1   |  |
| Bazedoxifene                                         | 7                          | 57.86  | 470.613 | 4                       | 2                    | 1                              | -6.81949 | 198481-32-2  |  |
| Dihydroergotamine                                    | 5                          | 118.21 | 583.689 | 6                       | 3                    | 1                              | -6.80512 | 511-12-6     |  |
| Rimegepant                                           | 5                          | 113.68 | 534.567 | 5                       | 2                    | 1                              | -6.80287 | 1289023-67-1 |  |
|                                                      |                            |        |         |                         |                      |                                |          |              |  |
| <b>Picornaviridae - Rhinovirus</b>                   |                            |        |         |                         |                      |                                |          |              |  |
| Drug information                                     |                            |        |         |                         |                      | Other relevant docking results |          |              |  |
| drug name                                            | rotatable<br>bond<br>count | TPSA   | Weight  | H2<br>acceptor<br>count | H2<br>donor<br>count | rseq                           | S-score  | cas          |  |
| Sirolimus                                            | 6                          | 195.43 | 914.187 | 12                      | 3                    | 1                              | -7.91188 | 53123-88-9   |  |
| Tacrolimus                                           | 7                          | 178.36 | 804.031 | 11                      | 3                    | 1                              | -7.16754 | 104987-11-3  |  |
| Rifabutin                                            | 5                          | 205.55 | 847.019 | 12                      | 5                    | 1                              | -7.1458  | 72559-06-9   |  |
| Pimecrolimus                                         | 6                          | 158.13 | 810.466 | 10                      | 2                    | 1                              | -7.04785 | 137071-32-0  |  |
| Rifapentine                                          | 6                          | 220.15 | 877.045 | 13                      | 6                    | 1                              | -6.98402 | 61379-65-5   |  |
| Ergotamine                                           | 5                          | 118.21 | 581.673 | 6                       | 3                    | 1                              | -6.88582 | 113-15-5     |  |
| Digoxin                                              | 7                          | 203.06 | 780.949 | 13                      | 6                    | 1                              | -6.85786 | 20830-75-5   |  |
| Lurasidone                                           | 5                          | 56.75  | 492.688 | 4                       | 0                    | 1                              | -6.8489  | 367514-87-2  |  |
| Dalfopristin                                         | 7                          | 176.42 | 690.859 | 9                       | 2                    | 1                              | -6.7067  | 112362-50-2  |  |
| Etoposide Phosphate                                  | 7                          | 201.04 | 666.525 | 12                      | 2                    | 1                              | -6.61666 | 117091-64-2  |  |
|                                                      |                            |        |         |                         |                      |                                |          |              |  |
| <b>Picornaviridae - Foot-and-mouth disease virus</b> |                            |        |         |                         |                      |                                |          |              |  |
| Drug information                                     |                            |        |         |                         |                      | Other relevant docking results |          |              |  |

| drug name                                   | rotatable<br>bond<br>count | TPSA   | Weight  | H2<br>acceptor<br>count | H2<br>donor<br>count | rseq                                  | S-score  | cas          |  |
|---------------------------------------------|----------------------------|--------|---------|-------------------------|----------------------|---------------------------------------|----------|--------------|--|
| Rifapentine                                 | 6                          | 220.15 | 877.045 | 13                      | 6                    | 1                                     | -7.85352 | 61379-65-5   |  |
| Digoxin                                     | 7                          | 203.06 | 780.949 | 13                      | 6                    | 1                                     | -7.84355 | 20830-75-5   |  |
| Rifampin                                    | 5                          | 220.15 | 822.953 | 13                      | 6                    | 1                                     | -7.77781 | 13292-46-1   |  |
| Sirolimus                                   | 6                          | 195.43 | 914.187 | 12                      | 3                    | 1                                     | -7.68884 | 53123-88-9   |  |
| Rifabutin                                   | 5                          | 205.55 | 847.019 | 12                      | 5                    | 1                                     | -7.6784  | 72559-06-9   |  |
| Azithromycin                                | 7                          | 180.08 | 748.996 | 13                      | 5                    | 1                                     | -7.60554 | 83905-01-5   |  |
| Eribulin                                    | 4                          | 146.39 | 729.908 | 12                      | 2                    | 1                                     | -7.56207 | 253128-41-5  |  |
| Trabectedin                                 | 4                          | 168.72 | 761.849 | 12                      | 4                    | 1                                     | -7.51409 | 114899-77-3  |  |
| Tacrolimus                                  | 7                          | 178.36 | 804.031 | 11                      | 3                    | 1                                     | -7.3484  | 104987-11-3  |  |
| Dalfopristin                                | 7                          | 176.42 | 690.859 | 9                       | 2                    | 1                                     | -7.14579 | 112362-50-2  |  |
|                                             |                            |        |         |                         |                      |                                       |          |              |  |
| <b>Picornaviridae - Sicinivirus A</b>       |                            |        |         |                         |                      |                                       |          |              |  |
| <b>Drug information</b>                     |                            |        |         |                         |                      | <b>Other relevant docking results</b> |          |              |  |
| drug name                                   | rotatable<br>bond<br>count | TPSA   | Weight  | H2<br>acceptor<br>count | H2<br>donor<br>count | rseq                                  | S-score  | cas          |  |
| Sirolimus                                   | 6                          | 195.43 | 914.187 | 12                      | 3                    | 1                                     | -16.0604 | 53123-88-9   |  |
| Tacrolimus                                  | 7                          | 178.36 | 804.031 | 11                      | 3                    | 1                                     | -15.9126 | 104987-11-3  |  |
| Digoxin                                     | 7                          | 203.06 | 780.949 | 13                      | 6                    | 1                                     | -15.4157 | 20830-75-5   |  |
| Avapritinib                                 | 5                          | 105.75 | 498.57  | 6                       | 1                    | 1                                     | -14.8323 | 1703793-34-3 |  |
| Ubrogepant                                  | 6                          | 104.29 | 549.553 | 5                       | 2                    | 1                                     | -14.6875 | 1374248-77-7 |  |
| Naldemedine                                 | 7                          | 141.18 | 570.646 | 8                       | 4                    | 1                                     | -14.6029 | 916072-89-4  |  |
| Eravacycline                                | 6                          | 193.73 | 558.563 | 10                      | 8                    | 1                                     | -14.5522 | 1207283-85-9 |  |
| Linagliptin                                 | 5                          | 113.48 | 472.553 | 6                       | 1                    | 1                                     | -14.4972 | 668270-12-0  |  |
| Ergotamine                                  | 5                          | 118.21 | 581.673 | 6                       | 3                    | 1                                     | -14.4733 | 113-15-5     |  |
| Dihydroergotamine                           | 5                          | 118.21 | 583.689 | 6                       | 3                    | 1                                     | -14.3847 | 511-12-6     |  |
|                                             |                            |        |         |                         |                      |                                       |          |              |  |
| <b>Picornaviridae - Porcine aichi virus</b> |                            |        |         |                         |                      |                                       |          |              |  |
| <b>Drug information</b>                     |                            |        |         |                         |                      | <b>Other relevant docking results</b> |          |              |  |



| drug name                                | rotatable<br>bond<br>count | TPSA   | Weight  | H2<br>acceptor<br>count | H2<br>donor<br>count | rseq                                  | S-score  | cas         |  |
|------------------------------------------|----------------------------|--------|---------|-------------------------|----------------------|---------------------------------------|----------|-------------|--|
| Sirolimus                                | 6                          | 195.43 | 914.187 | 12                      | 3                    | 1                                     | -7.99736 | 53123-88-9  |  |
| Rifabutin                                | 5                          | 205.55 | 847.019 | 12                      | 5                    | 1                                     | -7.7288  | 72559-06-9  |  |
| Digoxin                                  | 7                          | 203.06 | 780.949 | 13                      | 6                    | 1                                     | -7.66218 | 20830-75-5  |  |
| Rifapentine                              | 6                          | 220.15 | 877.045 | 13                      | 6                    | 1                                     | -7.18944 | 61379-65-5  |  |
| Pancuronium                              | 6                          | 52.6   | 572.875 | 2                       | 0                    | 1                                     | -7.11239 | 15500-66-0  |  |
| Bromocriptine                            | 6                          | 118.21 | 654.606 | 6                       | 3                    | 1                                     | -6.94399 | 25614-03-3  |  |
| Rifampin                                 | 5                          | 220.15 | 822.953 | 13                      | 6                    | 1                                     | -6.93922 | 13292-46-1  |  |
| Omadacycline                             | 7                          | 176.66 | 556.66  | 9                       | 8                    | 1                                     | -6.92493 | 389139-89-3 |  |
| Rifamycin                                | 3                          | 201.31 | 697.778 | 11                      | 6                    | 1                                     | -6.87913 | 6998-60-3   |  |
| M Rapacuronium                           | 7                          | 49.77  | 555.868 | 3                       | 1                    | 1                                     | -6.84144 | 736123-17-4 |  |
|                                          |                            |        |         |                         |                      |                                       |          |             |  |
| <b>Picornaviridae - Poliovirus</b>       |                            |        |         |                         |                      |                                       |          |             |  |
| <b>Drug information</b>                  |                            |        |         |                         |                      | <b>Other relevant docking results</b> |          |             |  |
| drug name                                | rotatable<br>bond<br>count | TPSA   | Weight  | H2<br>acceptor<br>count | H2<br>donor<br>count | rseq                                  | S-score  | cas         |  |
| Sirolimus                                | 6                          | 195.43 | 914.187 | 12                      | 3                    | 1                                     | -9.15525 | 53123-88-9  |  |
| Tacrolimus                               | 7                          | 178.36 | 804.031 | 11                      | 3                    | 1                                     | -8.83313 | 104987-11-3 |  |
| Pimecrolimus                             | 6                          | 158.13 | 810.466 | 10                      | 2                    | 1                                     | -8.02572 | 137071-32-0 |  |
| Azithromycin                             | 7                          | 180.08 | 748.996 | 13                      | 5                    | 1                                     | -7.87226 | 83905-01-5  |  |
| Bromocriptine                            | 6                          | 118.21 | 654.606 | 6                       | 3                    | 1                                     | -7.8623  | 25614-03-3  |  |
| Rifapentine                              | 6                          | 220.15 | 877.045 | 13                      | 6                    | 1                                     | -7.85416 | 61379-65-5  |  |
| Dalfopristin                             | 7                          | 176.42 | 690.859 | 9                       | 2                    | 1                                     | -7.7517  | 112362-50-2 |  |
| Rifampin                                 | 5                          | 220.15 | 822.953 | 13                      | 6                    | 1                                     | -7.75135 | 13292-46-1  |  |
| Eribulin                                 | 4                          | 146.39 | 729.908 | 12                      | 2                    | 1                                     | -7.60214 | 253128-41-5 |  |
| Dihydroergotamine                        | 5                          | 118.21 | 583.689 | 6                       | 3                    | 1                                     | -7.59658 | 511-12-6    |  |
|                                          |                            |        |         |                         |                      |                                       |          |             |  |
| <b>Picornaviridae - Coxsackievirus B</b> |                            |        |         |                         |                      |                                       |          |             |  |
| <b>Drug information</b>                  |                            |        |         |                         |                      | <b>Other relevant docking results</b> |          |             |  |

| drug name     | rotatable bond count | TPSA   | Weight  | H2 acceptor count | H2 donor count | rseq | S-score  | cas         |  |
|---------------|----------------------|--------|---------|-------------------|----------------|------|----------|-------------|--|
| Tacrolimus    | 7                    | 178.36 | 804.031 | 11                | 3              | 1    | -9.03564 | 104987-11-3 |  |
| Rifapentine   | 6                    | 220.15 | 877.045 | 13                | 6              | 1    | -8.81769 | 61379-65-5  |  |
| Sirolimus     | 6                    | 195.43 | 914.187 | 12                | 3              | 1    | -8.17726 | 53123-88-9  |  |
| Rifabutin     | 5                    | 205.55 | 847.019 | 12                | 5              | 1    | -8.15459 | 72559-06-9  |  |
| Lurbinectedin | 4                    | 164.28 | 784.887 | 11                | 4              | 1    | -8.06431 | 497871-47-3 |  |
| Rifampin      | 5                    | 220.15 | 822.953 | 13                | 6              | 1    | -8.0009  | 13292-46-1  |  |
| Pimecrolimus  | 6                    | 158.13 | 810.466 | 10                | 2              | 1    | -7.90693 | 137071-32-0 |  |
| Rifamycin     | 3                    | 201.31 | 697.778 | 11                | 6              | 1    | -7.87144 | 6998-60-3   |  |
| Azithromycin  | 7                    | 180.08 | 748.996 | 13                | 5              | 1    | -7.81096 | 83905-01-5  |  |
| Ergotamine    | 5                    | 118.21 | 581.673 | 6                 | 3              | 1    | -7.68561 | 113-15-5    |  |
|               |                      |        |         |                   |                |      |          |             |  |

#### Picornaviridae - Enterovirus 71

| Drug information |                      |        |         |                   |                | Other relevant docking results |          |             |  |
|------------------|----------------------|--------|---------|-------------------|----------------|--------------------------------|----------|-------------|--|
| drug name        | rotatable bond count | TPSA   | Weight  | H2 acceptor count | H2 donor count | rseq                           | S-score  | cas         |  |
| Sirolimus        | 6                    | 195.43 | 914.187 | 12                | 3              | 1                              | -7.57517 | 53123-88-9  |  |
| Digoxin          | 7                    | 203.06 | 780.949 | 13                | 6              | 1                              | -7.55949 | 20830-75-5  |  |
| Tacrolimus       | 7                    | 178.36 | 804.031 | 11                | 3              | 1                              | -7.49484 | 104987-11-3 |  |
| Pimecrolimus     | 6                    | 158.13 | 810.466 | 10                | 2              | 1                              | -7.16251 | 137071-32-0 |  |
| Erythromycin     | 7                    | 193.91 | 733.937 | 13                | 5              | 1                              | -6.74094 | 114-07-8    |  |
| Eribulin         | 4                    | 146.39 | 729.908 | 12                | 2              | 1                              | -6.68329 | 253128-41-5 |  |
| Rifapentine      | 6                    | 220.15 | 877.045 | 13                | 6              | 1                              | -6.63487 | 61379-65-5  |  |
| Omadacycline     | 7                    | 176.66 | 556.66  | 9                 | 8              | 1                              | -6.54386 | 389139-89-3 |  |
| Rifabutin        | 5                    | 205.55 | 847.019 | 12                | 5              | 1                              | -6.53503 | 72559-06-9  |  |
| Rifampin         | 5                    | 220.15 | 822.953 | 13                | 6              | 1                              | -6.52943 | 13292-46-1  |  |
|                  |                      |        |         |                   |                |                                |          |             |  |

#### Picornaviridae - Encephalomyocarditis virus

| Drug information |  |  |  |  |  | Other relevant docking results |  |  |  |
|------------------|--|--|--|--|--|--------------------------------|--|--|--|
|------------------|--|--|--|--|--|--------------------------------|--|--|--|

| drug name     | rotatable bond count | TPSA   | Weight  | H2 acceptor count | H2 donor count | rseq | S-score  | cas         |  |
|---------------|----------------------|--------|---------|-------------------|----------------|------|----------|-------------|--|
| Sirolimus     | 6                    | 195.43 | 914.187 | 12                | 3              | 1    | -8.97226 | 53123-88-9  |  |
| Tacrolimus    | 7                    | 178.36 | 804.031 | 11                | 3              | 1    | -7.88066 | 104987-11-3 |  |
| Pimecrolimus  | 6                    | 158.13 | 810.466 | 10                | 2              | 1    | -7.54961 | 137071-32-0 |  |
| Digoxin       | 7                    | 203.06 | 780.949 | 13                | 6              | 1    | -7.41649 | 20830-75-5  |  |
| Lurbinectedin | 4                    | 164.28 | 784.887 | 11                | 4              | 1    | -7.41422 | 497871-47-3 |  |
| Rifampin      | 5                    | 220.15 | 822.953 | 13                | 6              | 1    | -7.19006 | 13292-46-1  |  |
| Rifamycin     | 3                    | 201.31 | 697.778 | 11                | 6              | 1    | -7.18945 | 6998-60-3   |  |
| Eribulin      | 4                    | 146.39 | 729.908 | 12                | 2              | 1    | -7.17229 | 253128-41-5 |  |
| Bromocriptine | 6                    | 118.21 | 654.606 | 6                 | 3              | 1    | -7.13747 | 25614-03-3  |  |
| Pancuronium   | 6                    | 52.6   | 572.875 | 2                 | 0              | 1    | -7.09821 | 15500-66-0  |  |
|               |                      |        |         |                   |                |      |          |             |  |

#### Picornaviridae - Enterovirus D68

| Drug information |                      |        |         |                   |                | Other relevant docking results |          |              |  |
|------------------|----------------------|--------|---------|-------------------|----------------|--------------------------------|----------|--------------|--|
| drug name        | rotatable bond count | TPSA   | Weight  | H2 acceptor count | H2 donor count | rseq                           | S-score  | cas          |  |
| Sirolimus        | 6                    | 195.43 | 914.187 | 12                | 3              | 1                              | -8.50079 | 53123-88-9   |  |
| Rifapentine      | 6                    | 220.15 | 877.045 | 13                | 6              | 1                              | -8.08768 | 61379-65-5   |  |
| Pimecrolimus     | 6                    | 158.13 | 810.466 | 10                | 2              | 1                              | -7.62972 | 137071-32-0  |  |
| Tacrolimus       | 7                    | 178.36 | 804.031 | 11                | 3              | 1                              | -7.6278  | 104987-11-3  |  |
| Rifampin         | 5                    | 220.15 | 822.953 | 13                | 6              | 1                              | -7.5387  | 13292-46-1   |  |
| Eribulin         | 4                    | 146.39 | 729.908 | 12                | 2              | 1                              | -7.33406 | 253128-41-5  |  |
| Suvorexant       | 4                    | 80.29  | 450.93  | 4                 | 0              | 1                              | -7.14603 | 1030377-33-3 |  |
| Digoxin          | 7                    | 203.06 | 780.949 | 13                | 6              | 1                              | -6.9897  | 20830-75-5   |  |
| Ergotamine       | 5                    | 118.21 | 581.673 | 6                 | 3              | 1                              | -6.91333 | 113-15-5     |  |
| Azithromycin     | 7                    | 180.08 | 748.996 | 13                | 5              | 1                              | -6.78257 | 83905-01-5   |  |
|                  |                      |        |         |                   |                |                                |          |              |  |

#### Permutotetraviridae - Thosea asigna virus

| Drug information |  |  |  |  |  | Other relevant docking results |  |  |  |
|------------------|--|--|--|--|--|--------------------------------|--|--|--|
|------------------|--|--|--|--|--|--------------------------------|--|--|--|

| drug name                                                              | rotatable<br>bond<br>count | TPSA   | Weight  | H2<br>acceptor<br>count | H2<br>donor<br>count | rseq                           | S-score  | cas         |  |
|------------------------------------------------------------------------|----------------------------|--------|---------|-------------------------|----------------------|--------------------------------|----------|-------------|--|
| Rifampin                                                               | 5                          | 220.15 | 822.953 | 13                      | 6                    | 1                              | -8.37307 | 13292-46-1  |  |
| Sirolimus                                                              | 6                          | 195.43 | 914.187 | 12                      | 3                    | 1                              | -8.22613 | 53123-88-9  |  |
| Rifabutin                                                              | 5                          | 205.55 | 847.019 | 12                      | 5                    | 1                              | -7.52686 | 72559-06-9  |  |
| Rifapentine                                                            | 6                          | 220.15 | 877.045 | 13                      | 6                    | 1                              | -7.45106 | 61379-65-5  |  |
| Digoxin                                                                | 7                          | 203.06 | 780.949 | 13                      | 6                    | 1                              | -7.29813 | 20830-75-5  |  |
| Sildenafil                                                             | 7                          | 109.13 | 474.586 | 7                       | 1                    | 1                              | -7.18886 | 139755-83-2 |  |
| Irinotecan                                                             | 6                          | 112.51 | 586.689 | 6                       | 1                    | 1                              | -7.13626 | 97682-44-5  |  |
| Pimecrolimus                                                           | 6                          | 158.13 | 810.466 | 10                      | 2                    | 1                              | -6.88851 | 137071-32-0 |  |
| Etoposide                                                              | 5                          | 160.83 | 588.562 | 12                      | 3                    | 1                              | -6.86226 | 33419-42-0  |  |
| Linagliptin                                                            | 5                          | 113.48 | 472.553 | 6                       | 1                    | 1                              | -6.77978 | 668270-12-0 |  |
|                                                                        |                            |        |         |                         |                      |                                |          |             |  |
| <b>Coronaviridae - Severe acute respiratory syndrome coronavirus 2</b> |                            |        |         |                         |                      |                                |          |             |  |
| Drug information                                                       |                            |        |         |                         |                      | Other relevant docking results |          |             |  |
| drug name                                                              | rotatable<br>bond<br>count | TPSA   | Weight  | H2<br>acceptor<br>count | H2<br>donor<br>count | rseq                           | S-score  | cas         |  |
| Tacrolimus                                                             | 7                          | 178.36 | 804.031 | 11                      | 3                    | 1                              | -8.6515  | 104987-11-3 |  |
| Dalfopristin                                                           | 7                          | 176.42 | 690.859 | 9                       | 2                    | 1                              | -8.35717 | 112362-50-2 |  |
| Pimecrolimus                                                           | 6                          | 158.13 | 810.466 | 10                      | 2                    | 1                              | -8.02939 | 137071-32-0 |  |
| Rifapentine                                                            | 6                          | 220.15 | 877.045 | 13                      | 6                    | 1                              | -7.9257  | 61379-65-5  |  |
| Sirolimus                                                              | 6                          | 195.43 | 914.187 | 12                      | 3                    | 1                              | -7.9229  | 53123-88-9  |  |
| Rifabutin                                                              | 5                          | 205.55 | 847.019 | 12                      | 5                    | 1                              | -7.88086 | 72559-06-9  |  |
| Ergotamine                                                             | 5                          | 118.21 | 581.673 | 6                       | 3                    | 1                              | -7.82652 | 113-15-5    |  |
| Bromocriptine                                                          | 6                          | 118.21 | 654.606 | 6                       | 3                    | 1                              | -7.80572 | 25614-03-3  |  |
| Lurbinedin                                                             | 4                          | 164.28 | 784.887 | 11                      | 4                    | 1                              | -7.69796 | 497871-47-3 |  |
| Conivaptan                                                             | 6                          | 78.09  | 498.586 | 4                       | 3                    | 1                              | -7.64096 | 210101-16-9 |  |

Supplementary Table S2. Antiviral drug docking parameters.

| <b>Flaviviridae - Hepatitis C virus</b>  |                             |             |               |                          |                       |                                       |                |                    |
|------------------------------------------|-----------------------------|-------------|---------------|--------------------------|-----------------------|---------------------------------------|----------------|--------------------|
| <b>Drug information</b>                  |                             |             |               |                          |                       | <b>Other relevant docking results</b> |                |                    |
| <b>drug name</b>                         | <b>rotatable bond count</b> | <b>TPSA</b> | <b>Weight</b> | <b>H2 acceptor count</b> | <b>H2 donor count</b> | <b>rseq</b>                           | <b>S-score</b> | <b>rmsd_refine</b> |
| Elbasvir                                 | 13                          | 189         | 882           | 9                        | 4                     | 1                                     | -8.08897       | 2.0064008          |
| Pibrentasvir                             | 17                          | 200         | 1113.2        | 17                       | 4                     | 1                                     | -8.06932       | 3.3242452          |
| Faldaprevir                              | 15                          | 227         | 869.7999      | 12                       | 4                     | 1                                     | -7.56067       | 4.3306098          |
| Ritonavir                                | 18                          | 202         | 720.9         | 9                        | 4                     | 1                                     | -7.53194       | 2.3389802          |
| Velpatasvir                              | 13                          | 193         | 883           | 10                       | 4                     | 1                                     | -7.03962       | 3.267632           |
| Daclatasvir                              | 13                          | 175         | 738.9         | 8                        | 4                     | 1                                     | -6.937         | 2.3041263          |
| Simeprevir                               | 8                           | 194         | 749.9         | 10                       | 2                     | 1                                     | -6.75098       | 1.6410096          |
| Lopinavir                                | 15                          | 120         | 628.8         | 5                        | 4                     | 1                                     | -6.48458       | 1.5723376          |
| Asunaprevir                              | 14                          | 191         | 748.3         | 10                       | 3                     | 1                                     | -6.46881       | 2.1620514          |
| TMC310911                                | 15                          | 179         | 756           | 12                       | 3                     | 1                                     | -6.45315       | 2.2789028          |
|                                          |                             |             |               |                          |                       |                                       |                |                    |
| <b>Flaviviridae - Yellow fever virus</b> |                             |             |               |                          |                       |                                       |                |                    |
| <b>Drug information</b>                  |                             |             |               |                          |                       | <b>Other relevant docking results</b> |                |                    |
| <b>drug name</b>                         | <b>rotatable bond count</b> | <b>TPSA</b> | <b>Weight</b> | <b>H2 acceptor count</b> | <b>H2 donor count</b> | <b>rseq</b>                           | <b>S-score</b> | <b>rmsd_refine</b> |
| Elbasvir                                 | 13                          | 189         | 882           | 9                        | 4                     | 1                                     | -8.74685       | 2.4860983          |
| Velpatasvir                              | 13                          | 193         | 883           | 10                       | 4                     | 1                                     | -8.31956       | 2.9509103          |
| Daclatasvir                              | 13                          | 175         | 738.9         | 8                        | 4                     | 1                                     | -8.16457       | 1.9270446          |
| Pibrentasvir                             | 17                          | 200         | 1113.2        | 17                       | 4                     | 1                                     | -7.8953        | 2.1114364          |
| Faldaprevir                              | 15                          | 227         | 869.7999      | 12                       | 4                     | 1                                     | -7.60704       | 1.209281           |
| Simeprevir                               | 8                           | 194         | 749.9         | 10                       | 2                     | 1                                     | -7.46342       | 1.9784654          |
| Paritaprevir                             | 7                           | 198         | 765.9         | 10                       | 3                     | 1                                     | -7.38485       | 2.7492743          |
| Atazanavir                               | 18                          | 171         | 704.9         | 9                        | 5                     | 1                                     | -7.21475       | 1.8903244          |
| Tipranavir                               | 11                          | 114         | 602.7         | 10                       | 2                     | 1                                     | -7.16612       | 2.5746937          |
| Asunaprevir                              | 14                          | 191         | 748.3         | 10                       | 3                     | 1                                     | -6.99591       | 4.1787357          |
|                                          |                             |             |               |                          |                       |                                       |                |                    |
| <b>Flaviviridae - Zika virus</b>         |                             |             |               |                          |                       |                                       |                |                    |
| <b>Drug information</b>                  |                             |             |               |                          |                       | <b>Other relevant docking results</b> |                |                    |

| drug name                                         | rotatable bond count | TPSA | Weight   | H2 acceptor count | H2 donor count | rseq                           | S-score  | rmsd_refine |
|---------------------------------------------------|----------------------|------|----------|-------------------|----------------|--------------------------------|----------|-------------|
| Faldaprevir                                       | 15                   | 227  | 869.7999 | 12                | 4              | 1                              | -7.59145 | 4.6088991   |
| Asunaprevir                                       | 14                   | 191  | 748.3    | 10                | 3              | 1                              | -7.32715 | 3.2673604   |
| Velpatasvir                                       | 13                   | 193  | 883      | 10                | 4              | 1                              | -7.15729 | 2.0988696   |
| TMC310911                                         | 15                   | 179  | 756      | 12                | 3              | 1                              | -7.05128 | 2.4796042   |
| Ritonavir                                         | 18                   | 202  | 720.9    | 9                 | 4              | 1                              | -6.89945 | 3.7855556   |
| Letermovir                                        | 7                    | 77.8 | 572.5    | 10                | 1              | 1                              | -6.86807 | 1.1008978   |
| Atazanavir                                        | 18                   | 171  | 704.9    | 9                 | 5              | 1                              | -6.80127 | 3.1530945   |
| Glecaprevir                                       | 7                    | 204  | 838.9    | 15                | 3              | 1                              | -6.77939 | 1.8468144   |
| Elbasvir                                          | 13                   | 189  | 882      | 9                 | 4              | 1                              | -6.76237 | 3.3429101   |
| Simeprevir                                        | 8                    | 194  | 749.9    | 10                | 2              | 1                              | -6.74734 | 2.0395656   |
|                                                   |                      |      |          |                   |                |                                |          |             |
| <b>Flaviviridae - Bovine viral diarrhea virus</b> |                      |      |          |                   |                |                                |          |             |
| Drug information                                  |                      |      |          |                   |                | Other relevant docking results |          |             |
| drug name                                         | rotatable bond count | TPSA | Weight   | H2 acceptor count | H2 donor count | rseq                           | S-score  | rmsd_refine |
| Elbasvir                                          | 13                   | 189  | 882      | 9                 | 4              | 1                              | -7.81344 | 3.0644736   |
| Ritonavir                                         | 18                   | 202  | 720.9    | 9                 | 4              | 1                              | -7.74677 | 2.3628297   |
| Faldaprevir                                       | 15                   | 227  | 869.7999 | 12                | 4              | 1                              | -7.37845 | 1.7347846   |
| Velpatasvir                                       | 13                   | 193  | 883      | 10                | 4              | 1                              | -7.25284 | 3.3240459   |
| Cobicistat                                        | 20                   | 195  | 776      | 10                | 3              | 1                              | -7.2439  | 3.5859301   |
| Pibrentasvir                                      | 17                   | 200  | 1113.2   | 17                | 4              | 1                              | -7.0807  | 4.0254741   |
| Daclatasvir                                       | 13                   | 175  | 738.9    | 8                 | 4              | 1                              | -6.91492 | 1.2649411   |
| TMC310911                                         | 15                   | 179  | 756      | 12                | 3              | 1                              | -6.33464 | 1.524748    |
| Paritaprevir                                      | 7                    | 198  | 765.9    | 10                | 3              | 1                              | -6.32727 | 2.2121375   |
| Fosamprenavir                                     | 14                   | 186  | 585.6    | 11                | 4              | 1                              | -6.26566 | 2.1523497   |
|                                                   |                      |      |          |                   |                |                                |          |             |
| <b>Flaviviridae - West Nile virus</b>             |                      |      |          |                   |                |                                |          |             |
| Drug information                                  |                      |      |          |                   |                | Other relevant docking results |          |             |
| drug name                                         | rotatable bond count | TPSA | Weight   | H2 acceptor count | H2 donor count | rseq                           | S-score  | rmsd_refine |
| Pibrentasvir                                      | 17                   | 200  | 1113.2   | 17                | 4              | 1                              | -8.52122 | 5.3380089   |
| Elbasvir                                          | 13                   | 189  | 882      | 9                 | 4              | 1                              | -7.46264 | 2.0807712   |

|              |    |     |          |    |   |   |          |           |
|--------------|----|-----|----------|----|---|---|----------|-----------|
| Daclatasvir  | 13 | 175 | 738.9    | 8  | 4 | 1 | -7.21599 | 3.2081325 |
| Velpatasvir  | 13 | 193 | 883      | 10 | 4 | 1 | -7.02462 | 3.9562926 |
| Saquinavir   | 13 | 167 | 670.8    | 7  | 5 | 1 | -6.88588 | 6.9203229 |
| Faldaprevir  | 15 | 227 | 869.7999 | 12 | 4 | 1 | -6.85665 | 2.6740346 |
| Paritaprevir | 7  | 198 | 765.9    | 10 | 3 | 1 | -6.77194 | 3.3090506 |
| Asunaprevir  | 14 | 191 | 748.3    | 10 | 3 | 1 | -6.75287 | 7.287775  |
| Atazanavir   | 18 | 171 | 704.9    | 9  | 5 | 1 | -6.63312 | 6.6349368 |
| TMC310911    | 15 | 179 | 756      | 12 | 3 | 1 | -6.30659 | 3.3974891 |
|              |    |     |          |    |   |   |          |           |

#### Flaviviridae - Dengue virus

| Drug information |                      |      |          |                   |                | Other relevant docking results |          |             |
|------------------|----------------------|------|----------|-------------------|----------------|--------------------------------|----------|-------------|
| drug name        | rotatable bond count | TPSA | Weight   | H2 acceptor count | H2 donor count | rseq                           | S-score  | rmsd_refine |
| Elbasvir         | 13                   | 189  | 882      | 9                 | 4              | 1                              | -7.47441 | 3.6113799   |
| Cobicistat       | 20                   | 195  | 776      | 10                | 3              | 1                              | -7.29492 | 1.6891743   |
| Pibrentasvir     | 17                   | 200  | 1113.2   | 17                | 4              | 1                              | -7.1638  | 4.9325747   |
| Simeprevir       | 8                    | 194  | 749.9    | 10                | 2              | 1                              | -6.96879 | 2.2444115   |
| Faldaprevir      | 15                   | 227  | 869.7999 | 12                | 4              | 1                              | -6.94016 | 1.4080107   |
| Asunaprevir      | 14                   | 191  | 748.3    | 10                | 3              | 1                              | -6.841   | 1.5653238   |
| Atazanavir       | 18                   | 171  | 704.9    | 9                 | 5              | 1                              | -6.75269 | 3.0114336   |
| Velpatasvir      | 13                   | 193  | 883      | 10                | 4              | 1                              | -6.71179 | 4.6408563   |
| TMC310911        | 15                   | 179  | 756      | 12                | 3              | 1                              | -6.70028 | 3.8594439   |
| Ritonavir        | 18                   | 202  | 720.9    | 9                 | 4              | 1                              | -6.67118 | 1.5103495   |
|                  |                      |      |          |                   |                |                                |          |             |

#### Flaviviridae - Tick-borne encephalitis virus

| Drug information |                      |      |        |                   |                | Other relevant docking results |          |             |
|------------------|----------------------|------|--------|-------------------|----------------|--------------------------------|----------|-------------|
| drug name        | rotatable bond count | TPSA | Weight | H2 acceptor count | H2 donor count | rseq                           | S-score  | rmsd_refine |
| Pibrentasvir     | 17                   | 200  | 1113.2 | 17                | 4              | 1                              | -7.9361  | 3.6355605   |
| Elbasvir         | 13                   | 189  | 882    | 9                 | 4              | 1                              | -7.35491 | 1.5658795   |
| Atazanavir       | 18                   | 171  | 704.9  | 9                 | 5              | 1                              | -7.31605 | 1.8775066   |
| Velpatasvir      | 13                   | 193  | 883    | 10                | 4              | 1                              | -7.21685 | 3.4438629   |
| Lopinavir        | 15                   | 120  | 628.8  | 5                 | 4              | 1                              | -7.14208 | 1.2830409   |

|                                                   |                             |             |               |                          |                       |                                       |                |                    |
|---------------------------------------------------|-----------------------------|-------------|---------------|--------------------------|-----------------------|---------------------------------------|----------------|--------------------|
| Cobicistat                                        | 20                          | 195         | 776           | 10                       | 3                     | 1                                     | -7.10795       | 1.6422734          |
| Simeprevir                                        | 8                           | 194         | 749.9         | 10                       | 2                     | 1                                     | -7.06164       | 3.2029386          |
| Asunaprevir                                       | 14                          | 191         | 748.3         | 10                       | 3                     | 1                                     | -6.99644       | 2.7037504          |
| Daclatasvir                                       | 13                          | 175         | 738.9         | 8                        | 4                     | 1                                     | -6.91545       | 3.1354208          |
| Glecaprevir                                       | 7                           | 204         | 838.9         | 15                       | 3                     | 1                                     | -6.77664       | 2.2999425          |
|                                                   |                             |             |               |                          |                       |                                       |                |                    |
| <b>Flaviviridae - Classical swine fever virus</b> |                             |             |               |                          |                       |                                       |                |                    |
| <b>Drug information</b>                           |                             |             |               |                          |                       | <b>Other relevant docking results</b> |                |                    |
| <b>drug name</b>                                  | <b>rotatable bond count</b> | <b>TPSA</b> | <b>Weight</b> | <b>H2 acceptor count</b> | <b>H2 donor count</b> | <b>rseq</b>                           | <b>S-score</b> | <b>rmsd_refine</b> |
| Pibrentasvir                                      | 17                          | 200         | 1113.2        | 17                       | 4                     | 1                                     | -8.17737       | 1.9282414          |
| Elbasvir                                          | 13                          | 189         | 882           | 9                        | 4                     | 1                                     | -8.04305       | 2.0867991          |
| Velpatasvir                                       | 13                          | 193         | 883           | 10                       | 4                     | 1                                     | -7.8723        | 2.206986           |
| Daclatasvir                                       | 13                          | 175         | 738.9         | 8                        | 4                     | 1                                     | -7.38332       | 1.8605771          |
| Ritonavir                                         | 18                          | 202         | 720.9         | 9                        | 4                     | 1                                     | -7.30125       | 2.6110983          |
| Simeprevir                                        | 8                           | 194         | 749.9         | 10                       | 2                     | 1                                     | -7.07934       | 3.0122824          |
| TMC310911                                         | 15                          | 179         | 756           | 12                       | 3                     | 1                                     | -6.93911       | 1.7837961          |
| Asunaprevir                                       | 14                          | 191         | 748.3         | 10                       | 3                     | 1                                     | -6.90742       | 1.9378501          |
| Boceprevir                                        | 10                          | 151         | 519.7         | 5                        | 4                     | 1                                     | -6.54773       | 1.0166123          |
| Tipranavir                                        | 11                          | 114         | 602.7         | 10                       | 2                     | 1                                     | -6.4515        | 1.6823635          |
|                                                   |                             |             |               |                          |                       |                                       |                |                    |
| <b>Flaviviridae - Japanese encephalitis virus</b> |                             |             |               |                          |                       |                                       |                |                    |
| <b>Drug information</b>                           |                             |             |               |                          |                       | <b>Other relevant docking results</b> |                |                    |
| <b>drug name</b>                                  | <b>rotatable bond count</b> | <b>TPSA</b> | <b>Weight</b> | <b>H2 acceptor count</b> | <b>H2 donor count</b> | <b>rseq</b>                           | <b>S-score</b> | <b>rmsd_refine</b> |
| Paritaprevir                                      | 7                           | 198         | 765.9         | 10                       | 3                     | 1                                     | -9.65753       | 2.6597826          |
| Lopinavir                                         | 15                          | 120         | 628.8         | 5                        | 4                     | 1                                     | -9.35441       | 2.3489921          |
| Pibrentasvir                                      | 17                          | 200         | 1113.2        | 17                       | 4                     | 1                                     | -9.34248       | 4.4087238          |
| Simeprevir                                        | 8                           | 194         | 749.9         | 10                       | 2                     | 1                                     | -9.32398       | 1.6303653          |
| Adefovir Dipivoxil                                | 15                          | 167         | 501.5         | 12                       | 1                     | 1                                     | -9.26969       | 1.8219789          |
| Glecaprevir                                       | 7                           | 204         | 838.9         | 15                       | 3                     | 1                                     | -9.20661       | 1.988206           |
| Cobicistat                                        | 20                          | 195         | 776           | 10                       | 3                     | 1                                     | -9.05017       | 3.0318975          |
| Faldaprevir                                       | 15                          | 227         | 869.7999      | 12                       | 4                     | 1                                     | -9.02734       | 2.9768815          |



|                                                         |                             |             |               |                          |                       |                                       |                |                    |
|---------------------------------------------------------|-----------------------------|-------------|---------------|--------------------------|-----------------------|---------------------------------------|----------------|--------------------|
| Elbasvir                                                | 13                          | 189         | 882           | 9                        | 4                     | 1                                     | -8.87797       | 1.4862188          |
| Saquinavir                                              | 13                          | 167         | 670.8         | 7                        | 5                     | 1                                     | -8.86738       | 1.851944           |
|                                                         |                             |             |               |                          |                       |                                       |                |                    |
| <b>Caliciviridae - Rabbit Hemorrhagic Disease Virus</b> |                             |             |               |                          |                       |                                       |                |                    |
| <b>Drug information</b>                                 |                             |             |               |                          |                       | <b>Other relevant docking results</b> |                |                    |
| <b>drug name</b>                                        | <b>rotatable bond count</b> | <b>TPSA</b> | <b>Weight</b> | <b>H2 acceptor count</b> | <b>H2 donor count</b> | <b>rseq</b>                           | <b>S-score</b> | <b>rmsd_refine</b> |
| Pibrentasvir                                            | 17                          | 200         | 1113.2        | 17                       | 4                     | 1                                     | -9.03996       | 3.1416593          |
| Glecaprevir                                             | 7                           | 204         | 838.9         | 15                       | 3                     | 1                                     | -8.36509       | 1.6655881          |
| Velpatasvir                                             | 13                          | 193         | 883           | 10                       | 4                     | 1                                     | -8.03527       | 2.2849107          |
| Faldaprevir                                             | 15                          | 227         | 869.7999      | 12                       | 4                     | 1                                     | -7.85356       | 2.5907347          |
| Cobicistat                                              | 20                          | 195         | 776           | 10                       | 3                     | 1                                     | -7.84596       | 2.5260308          |
| Saquinavir                                              | 13                          | 167         | 670.8         | 7                        | 5                     | 1                                     | -7.84541       | 1.5516382          |
| Daclatasvir                                             | 13                          | 175         | 738.9         | 8                        | 4                     | 1                                     | -7.62798       | 3.5254316          |
| Indinavir                                               | 12                          | 118         | 613.8         | 7                        | 4                     | 1                                     | -7.60335       | 2.6847534          |
| Asunaprevir                                             | 14                          | 191         | 748.3         | 10                       | 3                     | 1                                     | -7.57237       | 1.6743689          |
| Grazoprevir                                             | 8                           | 204         | 766.9         | 11                       | 3                     | 1                                     | -7.48074       | 2.325218           |
|                                                         |                             |             |               |                          |                       |                                       |                |                    |
| <b>Caliciviridae - Norwalk virus</b>                    |                             |             |               |                          |                       |                                       |                |                    |
| <b>Drug information</b>                                 |                             |             |               |                          |                       | <b>Other relevant docking results</b> |                |                    |
| <b>drug name</b>                                        | <b>rotatable bond count</b> | <b>TPSA</b> | <b>Weight</b> | <b>H2 acceptor count</b> | <b>H2 donor count</b> | <b>rseq</b>                           | <b>S-score</b> | <b>rmsd_refine</b> |
| Simeprevir                                              | 8                           | 194         | 749.9         | 10                       | 2                     | 1                                     | -8.54072       | 2.4460149          |
| Pibrentasvir                                            | 17                          | 200         | 1113.2        | 17                       | 4                     | 1                                     | -8.45626       | 2.0636055          |
| TMC310911                                               | 15                          | 179         | 756           | 12                       | 3                     | 1                                     | -7.82328       | 2.9477968          |
| Velpatasvir                                             | 13                          | 193         | 883           | 10                       | 4                     | 1                                     | -7.68513       | 3.6971467          |
| Ritonavir                                               | 18                          | 202         | 720.9         | 9                        | 4                     | 1                                     | -7.48472       | 1.7189808          |
| Daclatasvir                                             | 13                          | 175         | 738.9         | 8                        | 4                     | 1                                     | -7.14448       | 2.4726825          |
| Asunaprevir                                             | 14                          | 191         | 748.3         | 10                       | 3                     | 1                                     | -7.07972       | 3.0797808          |
| Lopinavir                                               | 15                          | 120         | 628.8         | 5                        | 4                     | 1                                     | -6.93793       | 3.0241423          |
| Elbasvir                                                | 13                          | 189         | 882           | 9                        | 4                     | 1                                     | -6.92616       | 2.4678748          |
| Tipranavir                                              | 11                          | 114         | 602.7         | 10                       | 2                     | 1                                     | -6.70262       | 2.3889825          |
|                                                         |                             |             |               |                          |                       |                                       |                |                    |

| Caliciviridae - Sapporo virus    |                      |      |          |                   |                |                                |          |             |
|----------------------------------|----------------------|------|----------|-------------------|----------------|--------------------------------|----------|-------------|
| Drug information                 |                      |      |          |                   |                | Other relevant docking results |          |             |
| drug name                        | rotatable bond count | TPSA | Weight   | H2 acceptor count | H2 donor count | rseq                           | S-score  | rmsd_refine |
| Cobicistat                       | 20                   | 195  | 776      | 10                | 3              | 1                              | -8.55555 | 3.5620697   |
| Lopinavir                        | 15                   | 120  | 628.8    | 5                 | 4              | 1                              | -8.09583 | 3.3545964   |
| Ritonavir                        | 18                   | 202  | 720.9    | 9                 | 4              | 1                              | -8.07278 | 2.7049119   |
| Velpatasvir                      | 13                   | 193  | 883      | 10                | 4              | 1                              | -7.86397 | 3.151207    |
| Faldaprevir                      | 15                   | 227  | 869.7999 | 12                | 4              | 1                              | -7.63169 | 2.8498564   |
| Simeprevir                       | 8                    | 194  | 749.9    | 10                | 2              | 1                              | -7.57209 | 6.178628    |
| Atazanavir                       | 18                   | 171  | 704.9    | 9                 | 5              | 1                              | -7.55074 | 1.588237    |
| Pibrentasvir                     | 17                   | 200  | 1113.2   | 17                | 4              | 1                              | -7.47146 | 2.2140079   |
| Asunaprevir                      | 14                   | 191  | 748.3    | 10                | 3              | 1                              | -7.25966 | 4.0166941   |
| Saquinavir                       | 13                   | 167  | 670.8    | 7                 | 5              | 1                              | -7.02118 | 1.8621677   |
|                                  |                      |      |          |                   |                |                                |          |             |
| Caliciviridae - Murine norovirus |                      |      |          |                   |                |                                |          |             |
| Drug information                 |                      |      |          |                   |                | Other relevant docking results |          |             |
| drug name                        | rotatable bond count | TPSA | Weight   | H2 acceptor count | H2 donor count | rseq                           | S-score  | rmsd_refine |
| Faldaprevir                      | 15                   | 227  | 869.7999 | 12                | 4              | 1                              | -8.49482 | 2.2890763   |
| Elbasvir                         | 13                   | 189  | 882      | 9                 | 4              | 1                              | -8.03277 | 1.8270922   |
| TMC310911                        | 15                   | 179  | 756      | 12                | 3              | 1                              | -7.66716 | 1.883667    |
| Cobicistat                       | 20                   | 195  | 776      | 10                | 3              | 1                              | -7.63866 | 2.32495     |
| Asunaprevir                      | 14                   | 191  | 748.3    | 10                | 3              | 1                              | -7.4724  | 2.0450752   |
| Daclatasvir                      | 13                   | 175  | 738.9    | 8                 | 4              | 1                              | -7.38686 | 1.5950013   |
| Indinavir                        | 12                   | 118  | 613.8    | 7                 | 4              | 1                              | -7.33512 | 3.1546149   |
| Velpatasvir                      | 13                   | 193  | 883      | 10                | 4              | 1                              | -7.21816 | 3.6524951   |
| Ritonavir                        | 18                   | 202  | 720.9    | 9                 | 4              | 1                              | -7.17162 | 1.8828226   |
| Saquinavir                       | 13                   | 167  | 670.8    | 7                 | 5              | 1                              | -6.958   | 1.4695296   |
|                                  |                      |      |          |                   |                |                                |          |             |
| Picornaviridae - Rhinovirus      |                      |      |          |                   |                |                                |          |             |
| Drug information                 |                      |      |          |                   |                | Other relevant docking results |          |             |
| drug name                        | rotatable bond count | TPSA | Weight   | H2 acceptor count | H2 donor count | rseq                           | S-score  | rmsd_refine |

|              |    |     |          |    |   |   |          |           |
|--------------|----|-----|----------|----|---|---|----------|-----------|
| Pibrentasvir | 17 | 200 | 1113.2   | 17 | 4 | 1 | -8.41877 | 1.8659644 |
| Daclatasvir  | 13 | 175 | 738.9    | 8  | 4 | 1 | -7.99065 | 3.3949578 |
| TMC310911    | 15 | 179 | 756      | 12 | 3 | 1 | -7.80537 | 2.014998  |
| Faldaprevir  | 15 | 227 | 869.7999 | 12 | 4 | 1 | -7.36557 | 2.2707524 |
| Asunaprevir  | 14 | 191 | 748.3    | 10 | 3 | 1 | -7.20985 | 1.5784526 |
| Elbasvir     | 13 | 189 | 882      | 9  | 4 | 1 | -7.02102 | 2.5762348 |
| Velpatasvir  | 13 | 193 | 883      | 10 | 4 | 1 | -6.81942 | 2.5264175 |
| Atazanavir   | 18 | 171 | 704.9    | 9  | 5 | 1 | -6.6754  | 1.4590093 |
| Paritaprevir | 7  | 198 | 765.9    | 10 | 3 | 1 | -6.58898 | 2.9824302 |
| Nelfinavir   | 10 | 127 | 567.8    | 6  | 4 | 1 | -6.44515 | 2.6811311 |
|              |    |     |          |    |   |   |          |           |

**Picornaviridae - Foot-and-mouth disease virus**

| Drug information |                      |      |          |                   |                | Other relevant docking results |          |             |
|------------------|----------------------|------|----------|-------------------|----------------|--------------------------------|----------|-------------|
| drug name        | rotatable bond count | TPSA | Weight   | H2 acceptor count | H2 donor count | rseq                           | S-score  | rmsd_refine |
| Pibrentasvir     | 17                   | 200  | 1113.2   | 17                | 4              | 1                              | -8.11791 | 2.5394499   |
| Ritonavir        | 18                   | 202  | 720.9    | 9                 | 4              | 1                              | -8.04774 | 5.0281134   |
| Faldaprevir      | 15                   | 227  | 869.7999 | 12                | 4              | 1                              | -7.77907 | 3.9540565   |
| Cobicistat       | 20                   | 195  | 776      | 10                | 3              | 1                              | -7.74635 | 3.7080991   |
| Velpatasvir      | 13                   | 193  | 883      | 10                | 4              | 1                              | -7.55509 | 2.0866845   |
| TMC310911        | 15                   | 179  | 756      | 12                | 3              | 1                              | -7.50971 | 1.8903565   |
| Elbasvir         | 13                   | 189  | 882      | 9                 | 4              | 1                              | -7.45923 | 1.7902089   |
| Grazoprevir      | 8                    | 204  | 766.9    | 11                | 3              | 1                              | -7.23185 | 3.4524331   |
| Simeprevir       | 8                    | 194  | 749.9    | 10                | 2              | 1                              | -7.0612  | 2.5247068   |
| Nelfinavir       | 10                   | 127  | 567.8    | 6                 | 4              | 1                              | -6.89386 | 1.5721376   |
|                  |                      |      |          |                   |                |                                |          |             |

**Picornaviridae - Sicinivirus A**

| Drug information |                      |      |        |                   |                | Other relevant docking results |          |             |
|------------------|----------------------|------|--------|-------------------|----------------|--------------------------------|----------|-------------|
| drug name        | rotatable bond count | TPSA | Weight | H2 acceptor count | H2 donor count | rseq                           | S-score  | rmsd_refine |
| Elbasvir         | 13                   | 189  | 882    | 9                 | 4              | 1                              | -9.60662 | 3.9389417   |
| Pibrentasvir     | 17                   | 200  | 1113.2 | 17                | 4              | 1                              | -9.45904 | 1.5180686   |
| Simeprevir       | 8                    | 194  | 749.9  | 10                | 2              | 1                              | -9.05039 | 2.0904777   |

|              |    |     |          |    |   |   |          |           |
|--------------|----|-----|----------|----|---|---|----------|-----------|
| Faldaprevir  | 15 | 227 | 869.7999 | 12 | 4 | 1 | -9.01861 | 1.0372427 |
| TMC310911    | 15 | 179 | 756      | 12 | 3 | 1 | -8.96993 | 4.0140924 |
| Glecaprevir  | 7  | 204 | 838.9    | 15 | 3 | 1 | -8.93224 | 1.7932105 |
| Ritonavir    | 18 | 202 | 720.9    | 9  | 4 | 1 | -8.75001 | 2.0592415 |
| Paritaprevir | 7  | 198 | 765.9    | 10 | 3 | 1 | -8.54128 | 5.9056072 |
| Asunaprevir  | 14 | 191 | 748.3    | 10 | 3 | 1 | -8.38819 | 1.7741857 |
| Atazanavir   | 18 | 171 | 704.9    | 9  | 5 | 1 | -8.21476 | 2.2124505 |
|              |    |     |          |    |   |   |          |           |

#### Picornaviridae - Porcine aichi virus

| Drug information |                      |      |          |                   |                | Other relevant docking results |          |             |
|------------------|----------------------|------|----------|-------------------|----------------|--------------------------------|----------|-------------|
| drug name        | rotatable bond count | TPSA | Weight   | H2 acceptor count | H2 donor count | rseq                           | S-score  | rmsd_refine |
| Pibrentasvir     | 17                   | 200  | 1113.2   | 17                | 4              | 1                              | -9.53585 | 3.3291364   |
| Elbasvir         | 13                   | 189  | 882      | 9                 | 4              | 1                              | -8.64773 | 4.9959693   |
| Cobicistat       | 20                   | 195  | 776      | 10                | 3              | 1                              | -7.71308 | 2.4279871   |
| Grazoprevir      | 8                    | 204  | 766.9    | 11                | 3              | 1                              | -7.66645 | 3.9634478   |
| Asunaprevir      | 14                   | 191  | 748.3    | 10                | 3              | 1                              | -7.66037 | 3.969944    |
| Faldaprevir      | 15                   | 227  | 869.7999 | 12                | 4              | 1                              | -7.44145 | 3.0836513   |
| Velpatasvir      | 13                   | 193  | 883      | 10                | 4              | 1                              | -7.40925 | 1.6757953   |
| Ritonavir        | 18                   | 202  | 720.9    | 9                 | 4              | 1                              | -7.36326 | 2.9577777   |
| Daclatasvir      | 13                   | 175  | 738.9    | 8                 | 4              | 1                              | -7.2574  | 1.7913272   |
| Indinavir        | 12                   | 118  | 613.8    | 7                 | 4              | 1                              | -7.24389 | 2.8436437   |
|                  |                      |      |          |                   |                |                                |          |             |

#### Picornaviridae - Poliovirus

| Drug information |                      |      |          |                   |                | Other relevant docking results |          |             |
|------------------|----------------------|------|----------|-------------------|----------------|--------------------------------|----------|-------------|
| drug name        | rotatable bond count | TPSA | Weight   | H2 acceptor count | H2 donor count | rseq                           | S-score  | rmsd_refine |
| Daclatasvir      | 13                   | 175  | 738.9    | 8                 | 4              | 1                              | -8.89528 | 2.0335491   |
| Velpatasvir      | 13                   | 193  | 883      | 10                | 4              | 1                              | -8.57167 | 4.1986799   |
| TMC310911        | 15                   | 179  | 756      | 12                | 3              | 1                              | -8.50119 | 2.0121818   |
| Indinavir        | 12                   | 118  | 613.8    | 7                 | 4              | 1                              | -8.38184 | 2.4691854   |
| Atazanavir       | 18                   | 171  | 704.9    | 9                 | 5              | 1                              | -8.32909 | 1.8969368   |
| Faldaprevir      | 15                   | 227  | 869.7999 | 12                | 4              | 1                              | -8.16512 | 2.3023481   |

|               |    |     |       |    |   |   |          |           |
|---------------|----|-----|-------|----|---|---|----------|-----------|
| Asunaprevir   | 14 | 191 | 748.3 | 10 | 3 | 1 | -7.91606 | 4.277133  |
| Glecaprevir   | 7  | 204 | 838.9 | 15 | 3 | 1 | -7.90509 | 3.0035627 |
| Fosamprenavir | 14 | 186 | 585.6 | 11 | 4 | 1 | -7.85395 | 1.9007305 |
| Grazoprevir   | 8  | 204 | 766.9 | 11 | 3 | 1 | -7.853   | 2.4681702 |
|               |    |     |       |    |   |   |          |           |

#### Picornaviridae - Coxsackievirus B

| Drug information |                      |      |          |                   |                | Other relevant docking results |          |             |
|------------------|----------------------|------|----------|-------------------|----------------|--------------------------------|----------|-------------|
| drug name        | rotatable bond count | TPSA | Weight   | H2 acceptor count | H2 donor count | rseq                           | S-score  | rmsd_refine |
| Pibrentasvir     | 17                   | 200  | 1113.2   | 17                | 4              | 1                              | -10.2691 | 3.1064909   |
| Faldaprevir      | 15                   | 227  | 869.7999 | 12                | 4              | 1                              | -9.36034 | 2.706239    |
| Elbasvir         | 13                   | 189  | 882      | 9                 | 4              | 1                              | -9.27429 | 2.6072867   |
| Atazanavir       | 18                   | 171  | 704.9    | 9                 | 5              | 1                              | -8.92829 | 3.235029    |
| Daclatasvir      | 13                   | 175  | 738.9    | 8                 | 4              | 1                              | -8.81252 | 2.2757351   |
| Simeprevir       | 8                    | 194  | 749.9    | 10                | 2              | 1                              | -8.67508 | 1.9548296   |
| Ritonavir        | 18                   | 202  | 720.9    | 9                 | 4              | 1                              | -8.51379 | 1.693522    |
| Asunaprevir      | 14                   | 191  | 748.3    | 10                | 3              | 1                              | -8.30589 | 2.8585947   |
| Grazoprevir      | 8                    | 204  | 766.9    | 11                | 3              | 1                              | -8.26416 | 2.5908279   |
| Lopinavir        | 15                   | 120  | 628.8    | 5                 | 4              | 1                              | -8.26413 | 2.3035035   |
|                  |                      |      |          |                   |                |                                |          |             |

#### Picornaviridae - Enterovirus 71

| Drug information |                      |      |          |                   |                | Other relevant docking results |          |             |
|------------------|----------------------|------|----------|-------------------|----------------|--------------------------------|----------|-------------|
| drug name        | rotatable bond count | TPSA | Weight   | H2 acceptor count | H2 donor count | rseq                           | S-score  | rmsd_refine |
| Lopinavir        | 15                   | 120  | 628.8    | 5                 | 4              | 1                              | -8.05083 | 2.3307419   |
| Velpatasvir      | 13                   | 193  | 883      | 10                | 4              | 1                              | -7.81302 | 1.482374    |
| Faldaprevir      | 15                   | 227  | 869.7999 | 12                | 4              | 1                              | -7.71272 | 1.406225    |
| Ritonavir        | 18                   | 202  | 720.9    | 9                 | 4              | 1                              | -7.69824 | 2.0875652   |
| Elbasvir         | 13                   | 189  | 882      | 9                 | 4              | 1                              | -7.648   | 2.7108085   |
| Atazanavir       | 18                   | 171  | 704.9    | 9                 | 5              | 1                              | -7.59563 | 2.3386309   |
| Asunaprevir      | 14                   | 191  | 748.3    | 10                | 3              | 1                              | -7.53451 | 1.7668103   |
| Simeprevir       | 8                    | 194  | 749.9    | 10                | 2              | 1                              | -7.40489 | 2.9410374   |
| Remdesivir       | 14                   | 204  | 602.6    | 13                | 4              | 1                              | -7.24998 | 1.988232    |

|                                             |                      |      |          |                   |                |                                |          |             |
|---------------------------------------------|----------------------|------|----------|-------------------|----------------|--------------------------------|----------|-------------|
| Daclatasvir                                 | 13                   | 175  | 738.9    | 8                 | 4              | 1                              | -7.06726 | 1.8579408   |
|                                             |                      |      |          |                   |                |                                |          |             |
| Picornaviridae - Encephalomyocarditis virus |                      |      |          |                   |                |                                |          |             |
| Drug information                            |                      |      |          |                   |                | Other relevant docking results |          |             |
| drug name                                   | rotatable bond count | TPSA | Weight   | H2 acceptor count | H2 donor count | rseq                           | S-score  | rmsd_refine |
| Pibrentasvir                                | 17                   | 200  | 1113.2   | 17                | 4              | 1                              | -9.10627 | 1.8265388   |
| Cobicistat                                  | 20                   | 195  | 776      | 10                | 3              | 1                              | -8.69375 | 1.9722017   |
| Elbasvir                                    | 13                   | 189  | 882      | 9                 | 4              | 1                              | -8.33936 | 1.7930715   |
| Faldaprevir                                 | 15                   | 227  | 869.7999 | 12                | 4              | 1                              | -7.78355 | 2.7007823   |
| Grazoprevir                                 | 8                    | 204  | 766.9    | 11                | 3              | 1                              | -7.74204 | 1.4567504   |
| Simeprevir                                  | 8                    | 194  | 749.9    | 10                | 2              | 1                              | -7.69588 | 1.1795809   |
| Paritaprevir                                | 7                    | 198  | 765.9    | 10                | 3              | 1                              | -7.66112 | 5.6915388   |
| Glecaprevir                                 | 7                    | 204  | 838.9    | 15                | 3              | 1                              | -7.61538 | 2.0355229   |
| Asunaprevir                                 | 14                   | 191  | 748.3    | 10                | 3              | 1                              | -7.59181 | 3.0439818   |
| TMC310911                                   | 15                   | 179  | 756      | 12                | 3              | 1                              | -7.5566  | 2.6050415   |
|                                             |                      |      |          |                   |                |                                |          |             |
| Picornaviridae - Enterovirus D68            |                      |      |          |                   |                |                                |          |             |
| Drug information                            |                      |      |          |                   |                | Other relevant docking results |          |             |
| drug name                                   | rotatable bond count | TPSA | Weight   | H2 acceptor count | H2 donor count | rseq                           | S-score  | rmsd_refine |
| Pibrentasvir                                | 17                   | 200  | 1113.2   | 17                | 4              | 1                              | -8.90819 | 2.6152112   |
| Tmc310911                                   | 15                   | 179  | 756      | 12                | 3              | 1                              | -7.92275 | 1.8912758   |
| Grazoprevir                                 | 8                    | 204  | 766.9    | 11                | 3              | 1                              | -7.82144 | 1.916132    |
| Asunaprevir                                 | 14                   | 191  | 748.3    | 10                | 3              | 1                              | -7.72846 | 3.4367688   |
| Velpatasvir                                 | 13                   | 193  | 883      | 10                | 4              | 1                              | -7.72295 | 2.8790085   |
| Daclatasvir                                 | 13                   | 175  | 738.9    | 8                 | 4              | 1                              | -7.70067 | 1.68752     |
| Cobicistat                                  | 20                   | 195  | 776      | 10                | 3              | 1                              | -7.58851 | 3.2509      |
| Atazanavir                                  | 18                   | 171  | 704.9    | 9                 | 5              | 1                              | -7.42024 | 2.6924884   |
| Elbasvir                                    | 13                   | 189  | 882      | 9                 | 4              | 1                              | -7.41226 | 2.8252082   |
| Faldaprevir                                 | 15                   | 227  | 869.7999 | 12                | 4              | 1                              | -7.32369 | 1.5882791   |
|                                             |                      |      |          |                   |                |                                |          |             |
| Permutotetraviridae - Thosea asigna virus   |                      |      |          |                   |                |                                |          |             |

| Drug information                                                |                      |      |          |                   |                | Other relevant docking results |          |             |
|-----------------------------------------------------------------|----------------------|------|----------|-------------------|----------------|--------------------------------|----------|-------------|
| drug name                                                       | rotatable bond count | TPSA | Weight   | H2 acceptor count | H2 donor count | rseq                           | S-score  | rmsd_refine |
| Pibrentasvir                                                    | 17                   | 200  | 1113.2   | 17                | 4              | 1                              | -8.36022 | 4.3056946   |
| Elbasvir                                                        | 13                   | 189  | 882      | 9                 | 4              | 1                              | -7.57189 | 4.549839    |
| Daclatasvir                                                     | 13                   | 175  | 738.9    | 8                 | 4              | 1                              | -7.36794 | 2.5047803   |
| Velpatasvir                                                     | 13                   | 193  | 883      | 10                | 4              | 1                              | -7.34419 | 1.8090734   |
| Asunaprevir                                                     | 14                   | 191  | 748.3    | 10                | 3              | 1                              | -7.21125 | 1.3827612   |
| Saquinavir                                                      | 13                   | 167  | 670.8    | 7                 | 5              | 1                              | -7.06066 | 4.2023182   |
| Tmc310911                                                       | 15                   | 179  | 756      | 12                | 3              | 1                              | -6.98785 | 2.0409074   |
| Faldaprevir                                                     | 15                   | 227  | 869.7999 | 12                | 4              | 1                              | -6.94982 | 1.6306881   |
| Cobicistat                                                      | 20                   | 195  | 776      | 10                | 3              | 1                              | -6.92816 | 2.6698358   |
| Beclabuvir                                                      | 6                    | 113  | 659.8    | 7                 | 1              | 1                              | -6.80299 | 1.6370478   |
|                                                                 |                      |      |          |                   |                |                                |          |             |
| Coronaviridae - Severe acute respiratory syndrome coronavirus 2 |                      |      |          |                   |                |                                |          |             |
| Drug information                                                |                      |      |          |                   |                | Other relevant docking results |          |             |
| drug name                                                       | rotatable bond count | TPSA | Weight   | H2 acceptor count | H2 donor count | rseq                           | S-score  | rmsd_refine |
| Cobicistat                                                      | 20                   | 195  | 776      | 10                | 3              | 1                              | -8.97678 | 2.7672822   |
| Pibrentasvir                                                    | 17                   | 200  | 1113.2   | 17                | 4              | 1                              | -8.34582 | 2.4019134   |
| Faldaprevir                                                     | 15                   | 227  | 869.7999 | 12                | 4              | 1                              | -8.26969 | 2.1635737   |
| Ritonavir                                                       | 18                   | 202  | 720.9    | 9                 | 4              | 1                              | -8.19398 | 3.2771966   |
| Velpatasvir                                                     | 13                   | 193  | 883      | 10                | 4              | 1                              | -8.13801 | 2.666265    |
| Asunaprevir                                                     | 14                   | 191  | 748.3    | 10                | 3              | 1                              | -7.5965  | 2.9216647   |
| Saquinavir                                                      | 13                   | 167  | 670.8    | 7                 | 5              | 1                              | -7.5766  | 2.3707156   |
| Daclatasvir                                                     | 13                   | 175  | 738.9    | 8                 | 4              | 1                              | -7.46685 | 1.8453356   |
| Tipranavir                                                      | 11                   | 114  | 602.7    | 10                | 2              | 1                              | -7.46614 | 3.5127912   |
| Beclabuvir                                                      | 6                    | 113  | 659.8    | 7                 | 1              | 1                              | -7.3573  | 1.7283682   |
